# Supplementary material
Source: PubMed Central journal article supplement (PMC4090077)
Supplement: NIHMS562197-supplement-02.pdf [file NIHMS562197-supplement-02.pdf]

Table S1. *Pten*<sup>ΔC</sup> affected genes by aCGH, related to Figure 5

| Chromosome | Position             | Log Ratio | Affected Genes                |
|------------|----------------------|-----------|-------------------------------|
| 1          | 102198240- 102201788 | -2.8173   | Cntnap5b                      |
| 1          | 173512476- 173516924 | -1.0636   | Cd244                         |
| 1          | 90103575- 90209449   | 0.231     | Ugt1a, Heatr7b1, Hjurp, Trpm8 |
| 1          | 175808526-175910226  | 1.314     | Mndal, Mnda, Ifi203, Ifi202b  |
| 2          | 155441539- 155442750 | -1.9986   | Myh7b                         |
| 3          | 84647205- 84654237   | -0.7657   | Fbxw7                         |
| 6          | 56225369- 56232669   | 1.4071    | Pde1c                         |
| 7          | 26790284- 26981840   | 0.6325    | Cyp2b 13, Cyp2b9              |
| 8          | 115311513- 115314868 | -0.2308   | <b>Wwox</b>                   |
| 10         | 73965817- 73967099   | 1.0636    | Pcdh15                        |
| 12         | 42026419- 42030776   | -3.4643   | Immp2l                        |
| 14         | 11057433- 11064594   | -0.2682   | <b>Fhit</b>                   |
| 18         | 9815537- 10024200    | -0.5089   | Colec12, Thoc1, Usp14         |

Knock-in of *Pten*<sup>ΔC</sup> causes gene copy number changes. Gene copy number alteration was analyzed in *Pten*<sup>+/+</sup> and *Pten*<sup>+/<sup>ΔC</sup></sup> MEFs using a comparative genomic hybridization array (aCGH). Two common fragile site genes, *Wwox* and *Fhit*, are highlighted among selected genes affected by *Pten*<sup>ΔC</sup> knock-in.

Table S2. Comparison between *Pten*<sup>+ΔC</sup> mice and *Pten*<sup>+/-</sup> mice

|                         | <i>Pten</i> <sup>+/-</sup> [1]       | <i>Pten</i> <sup>+/-</sup> [2] | <i>Pten</i> <sup>+/-</sup> [3,4] |                                | <i>Pten</i> <sup>+ΔC</sup>          |
|-------------------------|--------------------------------------|--------------------------------|----------------------------------|--------------------------------|-------------------------------------|
| Age                     | 6-22 weeks                           | 6-30 weeks                     | 8-32 weeks                       | 26-66 weeks                    | 12-60 weeks                         |
| Breast                  | N/A                                  | N/A                            | N/A                              | 32/65                          | 6/21 (benign)<br>2/21 (malignant)   |
| Thyroid                 | 3/20 (neoplasia)<br>1/20 (carcinoma) | 1/20 (carcinoma)               | N/A                              | N/A                            | 11/31 (adenoma)<br>2/31 (carcinoma) |
| Gastrointestinal polyps | All                                  | All<br>3/20 (colon cancer)     | Most                             | 7/81                           | 25/35                               |
| Endometrial             | 20/20 (AH)                           | N/A                            | N/A                              | 65/65 (hyper)<br>14/65 (car)   | 13/21 (hyperplasia)                 |
| Skin & mucosa           | N/A                                  | 9/20 (hyperkeratosis)          | N/A                              | N/A                            | 3/30                                |
| Prostate                | 3/8 (PIN)                            | All (hyperplasia)              | 1/66 (cancer)                    | 1/16 (carcinoma)<br>4/16 (PIN) | 7/14 (PIN)                          |
| Lymphoma                | 7/256 (T cell)                       | N/A                            | 8/66 (T cell)                    | 15/83                          | 6/35 (B cell)                       |
| Adrenal                 | N/A                                  | N/A                            | N/A                              | 9/81 (>35 w)                   | 20/33<br>(4 metastasis)             |

- [1] Podsypanina K et al. Mutation of *Pten*/*Mmac1* in mice causes neoplasia in multiple organ systems. *Proc Natl Acad Sci U S A*. 1999 Feb 16;96(4):1563-8.
- [2] Di Cristofano A et al. *Pten* is essential for embryonic development and tumour suppression. *Nat Genet*. 1998 Aug;19(4):348-55.
- [3] Suzuki A et al. High cancer susceptibility and embryonic lethality associated with mutation of the *PTEN* tumor suppressor gene in mice. *Curr Biol*. 1998 Oct 22;8(21):1169-78.
- [4] Stambolic V et al. High incidence of breast and endometrial neoplasia resembling human Cowden syndrome in *pten*<sup>+/-</sup> mice. *Cancer Res*. 2000 Jul 1;60(13):3605-11.
